# Supplementary material for: Vanillic acid attenuates testosterone-induced benign prostatic hyperplasia in rats and inhibits proliferation of prostatic epithelial cells
Source: PubMed Central journal article supplement (PMC5675626; doi:10.18632/oncotarget.19909), 2017-08-03
Supplement: oncotarget-08-87194-s001.pdf [file oncotarget-08-87194-s001.pdf]

# Vanillic acid attenuates testosterone-induced benign prostatic hyperplasia in rats and inhibits proliferation of prostatic epithelial cells

## SUPPLEMENTARY MATERIALS

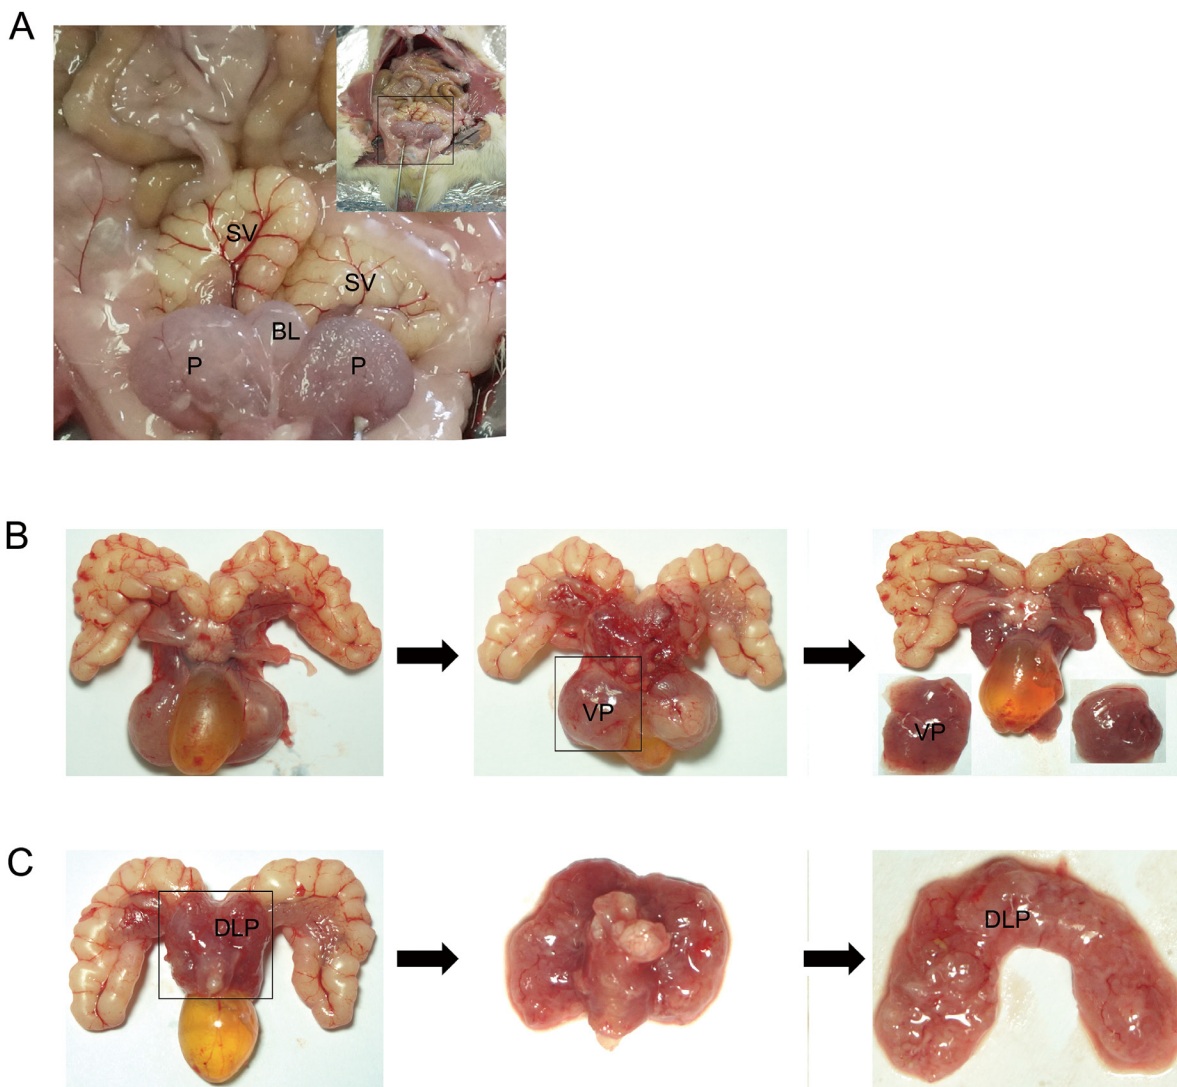

**Supplementary Figure 1: The location and dissection of the prostate.** (A) Genital organs in the abdominal cavity (SV, seminal vesicle; BL, bladder; P, prostate). (B) Ventral view of the isolated organs (VP, ventral prostate) and (C) dorsal view of the isolated organs (DLP, dorsolateral prostate). The dissection proceeded as stated in the steps.
